# Supplementary material
Source: Springer Nature journal article supplement (https://www.springermedizin.de/resource/supplementary/13256_2008_526_MOESM1_ESM.pdf/9646174)

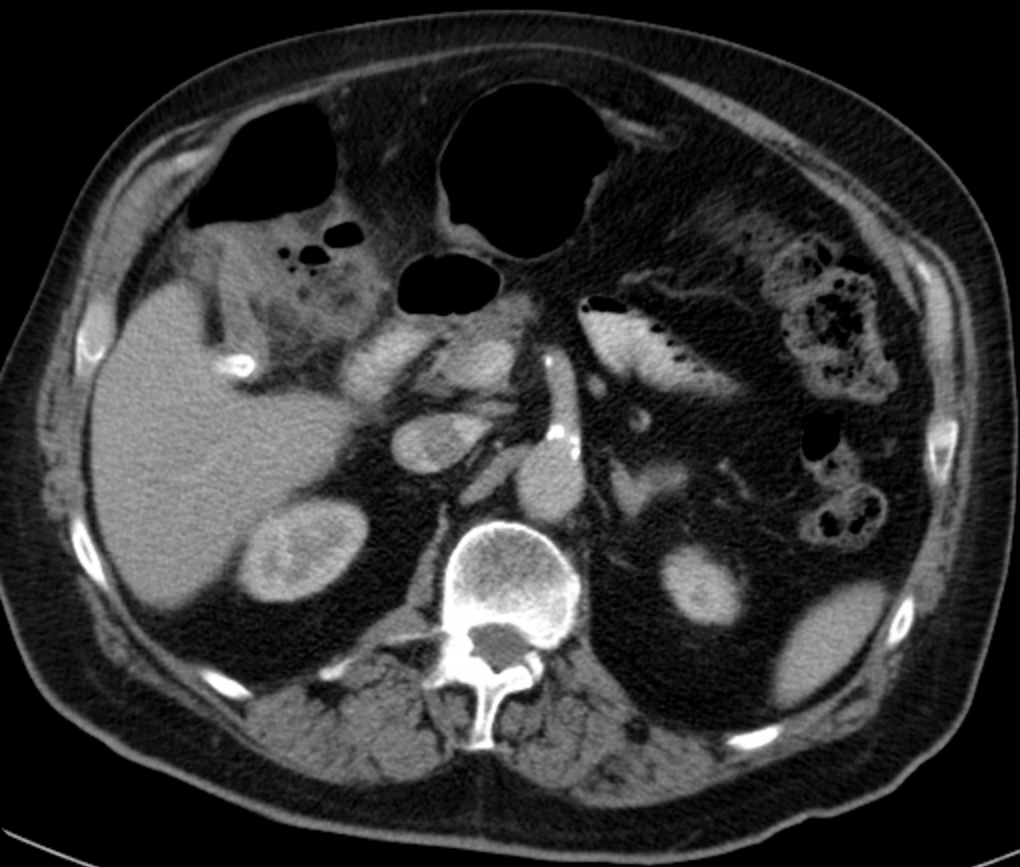

Supplement: MOESM1 [file 9646174]
